# Supplementary material for: Type I Interferons Direct Gammaherpesvirus Host Colonization
Source: PubMed Central journal article supplement (PMC4880296; doi:10.1371/journal.ppat.1005654), 2016-05-25

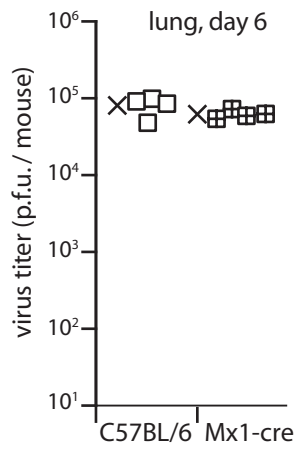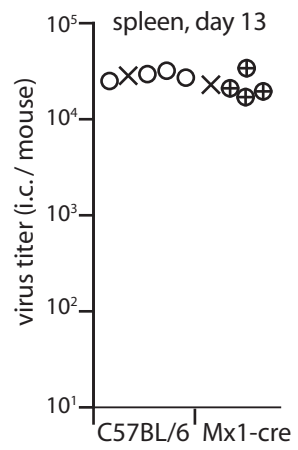

Supplement: ppat.1005654.s002.pdf [file ppat.1005654.s002.pdf]
